# Supplementary material for: Association of oxidized ApoB and oxidized ApoA-I with high-risk coronary plaque features in cardiovascular disease
Source: PubMed Central journal article supplement (PMC10619497; doi:10.1172/jci.insight.172893), 2023-10-23
Supplement: jciinsight-8-172893-s231.pdf [file jciinsight-8-172893-s231.pdf]

**Supplemental Table 1.** Demographic and clinical characteristics of the study and control cohorts

| <b>Parameter</b>                        | <b>Study cohort<br/>(N = 306)</b> | <b>Control cohort<br/>(N = 42)</b> | <b>P</b>       |
|-----------------------------------------|-----------------------------------|------------------------------------|----------------|
| <b>Demographics and medical history</b> |                                   |                                    |                |
| CAD, n (%)                              | 280 (91.5)                        | 0 (0.0)                            | < <b>0.001</b> |
| Age (years)                             | 56.31 ± 13.25                     | 51.52 ± 7.58                       | <b>0.02</b>    |
| Male sex, n (%)                         | 179 (58.5)                        | 24 (57.1)                          | 0.87           |
| Body mass index (kg/m <sup>2</sup> )    | 28.41 ± 6.65                      | 23.15 ± 3.16                       | < <b>0.001</b> |
| Hypertension, n (%)                     | 97 (31.7)                         | 0 (0.0)                            | < <b>0.001</b> |
| <b>Race</b>                             |                                   |                                    |                |
| White                                   | 202 (66.0)                        |                                    |                |
| Black or African American               | 46 (15.0)                         |                                    |                |
| Asian                                   | 47 (15.4)                         | 42 (100)                           | < <b>0.001</b> |
| More than one race                      | 3 (1.0)                           |                                    |                |
| Unknown                                 | 7 (2.3)                           |                                    |                |
| American Indian/Alaskan Native          | 1 (0.3)                           |                                    |                |
| Type 2-diabetes, n (%)                  | 57 (18.6)                         | 0 (0.0)                            | <b>0.002</b>   |
| Current smoker, n (%)                   | 23 (7.5)                          | 0 (0.0)                            | 0.07           |
| Statin treatment, n (%)                 | 133 (43.5)                        | 0 (0.0)                            | < <b>0.001</b> |
| Post-PCI, n (%)                         | 110 (35.9)                        | N/A                                | 1.0            |
| Post-CABG, n (%)                        | 18 (5.9)                          | N/A                                | 1.0            |
| <b>Clinical and laboratory values</b>   |                                   |                                    |                |
| Total cholesterol (mg/dL)               | 175 (153-202)                     | 214 (187-231)                      | < <b>0.001</b> |
| HDL cholesterol (mg/ dL)                | 52.15 (40.5-66.9)                 | 59.5 (50-69)                       | 0.06           |
| LDL cholesterol (mg/dL)                 | 104.5 (81-125)                    | 122 (112-147)                      | < <b>0.001</b> |
| Triglycerides (mg/dL)                   | 114 (74-165)                      | 96.5 (73-128)                      | 0.08           |
| LDL-TG (mg/dL)                          | 15.64 ± 5.48                      | N/A                                | 1.0            |
| sdLDL-C (mg/dL)                         | 29.3 (21.5-37.6)                  | N/A                                | 1.0            |
| ApoA-I (mg/dL)                          | 151 (130-178)                     | N/A                                | 1.0            |
| ApoB (mg/dL)                            | 87.84 ± 23.31                     | N/A                                | 1.0            |
| Cholesterol efflux capacity             | 1.06 ± 0.23                       | N/A                                | 1.0            |
| CETP activity (pmol/μL/hr)              | 5.10 (3.51-6.35)                  | N/A                                | 1.0            |
| hsCRP (mg/L)                            | 1.3 (0.7-3.3)                     | N/A                                | 1.0            |
| GlycA (μmol/L)                          | 383.61 ± 69.94                    | N/A                                | 1.0            |
| <b>NMR profile</b>                      |                                   |                                    |                |
| LDL Particle                            | 1488 (1149-1790)                  | N/A                                | 1.0            |
| HDL Particle                            | 20 (18-23)                        | N/A                                | 1.0            |
| TG-Rich Particle                        | 121 (69-176)                      | N/A                                | 1.0            |
| <b>OMLs and pathway markers</b>         |                                   |                                    |                |
| oxLDL (U/L)                             | 88.29 (62.15-116.06)              | 49.20 (41.8-59.97)                 | < <b>0.001</b> |
| sLOX-1 (pg/mL)                          | 204 (150.5-303.5)                 | N/A                                | 1.0            |
| sCD36 (ng/mL)                           | 0.00 (0.00-0.16)                  | N/A                                | 1.0            |

|                                                     |                        |                      |                  |
|-----------------------------------------------------|------------------------|----------------------|------------------|
| oxHDL (U/mL)                                        | 646.49 (442.29-864.19) | 135.96 (85.1-191.16) | <b>&lt;0.001</b> |
| <b>CCTA parameters and CAC score</b>                |                        |                      |                  |
| Total plaque burden (x100), mm <sup>2</sup>         | 1.11 ± 0.39            | N/A                  | 1.0              |
| Non-calcified plaque burden (x100), mm <sup>2</sup> | 1.06 ± 0.39            | N/A                  | 1.0              |
| lnCAC score                                         | 0 (0-4.85)             | N/A                  | 1.0              |
| Fibrous plaque burden (x100), mm <sup>2</sup>       | 0.448 (0.308-0.575)    | N/A                  | 1.0              |
| Fibro-fatty burden (x100), mm <sup>2</sup>          | 0.065 (0.034-0.108)    | N/A                  | 1.0              |
| Necrotic burden (x100), mm <sup>2</sup>             | 0.005 (0.002-0.011)    | N/A                  | 1.0              |

Data represented as mean ± SD or median (IQR) for parametric and non-parametric variables respectively and as n (%) for categorical variables. CAC, Agatston score; CETP, cholesteryl ester transfer protein; hs(CRP), high-sensitivity C-reactive protein; OMLs, oxidation-modified lipoproteins; oxHDL, oxidized HDL; oxLDL, oxidized LDL; sCD36, soluble CD36; sLOX-1, soluble LOX-1.

**Supplemental Table 2.** Association between oxLDL, lipid profile and OMLs pathway markers

| Parameter                             | oxLDL                  |                     |                          |
|---------------------------------------|------------------------|---------------------|--------------------------|
|                                       | LOW                    | HIGH                | TOTAL                    |
| <b>Clinical and laboratory values</b> |                        |                     |                          |
| Total cholesterol (mg/dL)             | 0.264; <b>0.001</b>    | 0.093; 0.255        | 0.320; < <b>0.0001</b>   |
| HDL cholesterol (mg/ dL)              | -0.021; 0.799          | -0.047; 0.562       | -0.011; 0.847            |
| LDL cholesterol (mg/dL)               | 0.208; <b>0.01</b>     | 0.187; <b>0.02</b>  | 0.405; ; < <b>0.0001</b> |
| Triglycerides (mg/dL)                 | 0.181; <b>0.03</b>     | 0.075; 0.358        | 0.175; <b>0.002</b>      |
| LDL-TG (mg/dL)                        | 0.120; 0.141           | 0.075; 0.360        | 0.242; < <b>0.0001</b>   |
| sdLDL-C (mg/dL)                       | 0.317; <b>0.0001</b>   | 0.145; 0.075        | 0.359; < <b>0.0001</b>   |
| ApoA-I (mg/dL)                        | 0.029; 0.727           | 0.008; 0.920        | -0.020; 0.724            |
| ApoB (mg/dL)                          | 0.350; < <b>0.0001</b> | 0.134; 0.101        | 0.405; < <b>0.0001</b>   |
| Cholesterol efflux capacity           | -0.070; 0.389          | -0.179; <b>0.03</b> | -0.152; <b>0.01</b>      |
| CETP activity (pmol/μL/hr)            | 0.003; 0.969           | 0.067; 0.420        | 0.132; <b>0.02</b>       |
| <b>NMR Profile</b>                    |                        |                     |                          |
| LDL Particle                          | 0.324; <b>0.0001</b>   | 0.176; <b>0.032</b> | 0.410; < <b>0.0001</b>   |
| L-LDLP                                | 0.038; 0.679           | -0.011; 0.899       | 0.064; 0.315             |
| M-LDLP                                | 0.214; <b>0.011</b>    | -0.098; 0.262       | 0.126; <b>0.04</b>       |
| S-LDLP                                | 0.082; 0.329           | 0.139; 0.096        | 0.221; <b>0.0002</b>     |
| HDL Particle                          | 0.091; 0.272           | 0.111; 0.177        | 0.039; 0.500             |
| L-HDLP                                | -0.125; 0.131          | -0.110; 0.180       | -0.175; <b>0.003</b>     |
| M-HDLP                                | 0.022; 0.795           | 0.061; 0.464        | 0.062; 0.288             |
| S-HDLP                                | 0.099; 0.230           | 0.137; 0.095        | 0.089; 0.126             |
| TG-Rich Particle                      | 0.209; <b>0.010</b>    | 0.178; <b>0.03</b>  | 0.206; <b>0.0003</b>     |
| Very Large TRLP                       | 0.113; 0.174           | -0.086; 0.320       | -0.034; 0.569            |
| Large TRLP                            | 0.089; 0.316           | 0.066; 0.458        | 0.150; <b>0.016</b>      |
| Medium TRLP                           | 0.066; 0.434           | 0.057; 0.506        | 0.046; 0.444             |
| Small TRLP                            | 0.205; <b>0.020</b>    | 0.025; 0.773        | 0.040; 0.510             |
| Very Small TRLP                       | 0.121; 0.160           | 0.213; <b>0.011</b> | 0.223; <b>0.0002</b>     |
| <b>OMLs and pathway markers</b>       |                        |                     |                          |
| sLOX-1 (pg/mL)                        | -0.009; 0.912          | 0.185; <b>0.025</b> | 0.087; 0.138             |
| sCD36 (ng/mL)                         | -0.091; 0.275          | 0.089; 0.288        | 0.058; 0.320             |
| oxHDL (U/mL)                          | 0.101; 0.254           | 0.117; 0.453        | 0.018; 0.818             |

Results from Spearman correlation were reported as *r* coefficient (P values). P<0.05 considered significant. CAC, Agatston score; CETP, cholesteryl ester transfer protein; hs(CRP), high-sensitivity C-reactive protein; OMLs, oxidation-modified lipoproteins; oxHDL, oxidized HDL; oxLDL, oxidized LDL; sCD36, soluble CD36; sLOX-1, soluble LOX-1.

**Supplemental Table 3.** Correlation between oxLDL and lipids of interest based on statin treatment

| Parameters         | Non_statin (n=173) | Statin (n=133) |
|--------------------|--------------------|----------------|
| LDL-C (direct)     | 0.353; <0.0001     | 0.429; <0.0001 |
| LDL-C (calculated) | 0.297; 0.0001      | 0.410; <0.0001 |
| LDL-TG             | 0.297; 0.0001      | 0.230; 0.01    |
| sdLDL-C            | 0.385; <0.0001     | 0.362; <0.0001 |

Results from Spearman correlation were reported as *r* coefficient (P values). P<0.05 considered significant.

**Supplemental Table 4.** Difference between HDL and LDL particles size based on statin treatment

| Parameters | Non_statin (n=173)      | Statin (n=133)          | P      |
|------------|-------------------------|-------------------------|--------|
| L-LDLP     | 139.98 (60.06-299.46)   | 65.78 (21.69-158.07)    | <0.001 |
| S-LDLP     | 703.57 (267.84-1256.65) | 842.56 (445.84-1113.84) | 0.33   |
| L-HDLP     | 1.97 (0.96-3.40)        | 1.25 (0.70-2.40)        | <0.001 |
| S-HDLP     | 13.48 (11.35-16.13)     | 15.65 (13.19-17.61)     | <0.001 |

Data are presented as median (IQR). P values were derived from Wilcoxon rank-sum test. P<0.05 considered significant.

**Supplemental Table 5A.** Comparison between oxLDL (n=306) and other pathway markers association with CCTA plaque characteristics

| Variable                                   | CETP                    | oxLDL                       | LDL-C            | sLOX-1                 | sCD36                   | SLDL-P                      |
|--------------------------------------------|-------------------------|-----------------------------|------------------|------------------------|-------------------------|-----------------------------|
| <b>CCTA</b>                                |                         |                             |                  |                        |                         |                             |
| <b>TB</b>                                  | -0.013;<br>0.684        | 0.081;<br><b>0.015</b>      | -0.005;<br>0.877 | 0.116;<br><b>0.001</b> | -0.018;<br>0.608        | 0.198;<br><b>&lt;0.0001</b> |
| <b>NCB</b>                                 | -0.004;<br>0.908        | 0.092;<br><b>0.006</b>      | 0.026;<br>0.450  | 0.092;<br><b>0.008</b> | 0.001;<br>0.982         | 0.205;<br><b>&lt;0.0001</b> |
| <b>CAC</b>                                 | -0.092;<br><b>0.007</b> | -0.022;<br>0.705            | -0.094;<br>0.102 | 0.024;<br>0.691        | -0.113;<br><b>0.001</b> | 0.127;<br><b>0.032</b>      |
| <b>Plaque morphology index</b>             |                         |                             |                  |                        |                         |                             |
| <b>Fibrous burden (mm<sup>2</sup>)</b>     | 0.029;<br>0.395         | 0.071;<br><b>0.036</b>      | 0.019;<br>0.579  | 0.040;<br>0.239        | -0.011;<br>0.757        | 0.151;<br><b>&lt;0.0001</b> |
| <b>Fibro-fatty burden (mm<sup>2</sup>)</b> | 0.032;<br>0.344         | 0.138;<br><b>&lt;0.0001</b> | -0.005;<br>0.889 | 0.033;<br>0.321        | 0.019;<br>0.566         | 0.212;<br><b>&lt;0.0001</b> |
| <b>Necrotic burden (mm<sup>2</sup>)</b>    | 0.060;<br>0.078         | 0.134;<br><b>0.0001</b>     | -0.015;<br>0.650 | -0.006;<br>0.849       | 0.022;<br>0.521         | 0.149;<br><b>&lt;0.0001</b> |

**Supplemental Table 5B.** Comparison between oxHDL (n=173) and other pathway markers association with CCTA plaque characteristics

| Variable                                   | CEC                     | oxHDL                        | HDL-C                        | ApoA-I                       | LHDL-P                       |
|--------------------------------------------|-------------------------|------------------------------|------------------------------|------------------------------|------------------------------|
| <b>CCTA</b>                                |                         |                              |                              |                              |                              |
| <b>TB</b>                                  | -0.127;<br><b>0.004</b> | -0.029;<br>0.515             | -0.271;<br><b>&lt;0.0001</b> | -0.288;<br><b>&lt;0.0001</b> | -0.270;<br><b>&lt;0.0001</b> |
| <b>NCB</b>                                 | -0.102;<br><b>0.022</b> | -0.003;<br>0.948             | -0.227;<br><b>&lt;0.0001</b> | -0.255;<br><b>&lt;0.0001</b> | -0.252;<br><b>&lt;0.0001</b> |
| <b>CAC</b>                                 | -0.159;<br><b>0.037</b> | 0.149;<br><b>0.049</b>       | -0.216;<br><b>0.004</b>      | -0.122;<br>0.112             | -0.201;<br><b>0.009</b>      |
| <b>Plaque morphology index</b>             |                         |                              |                              |                              |                              |
| <b>Fibrous burden (mm<sup>2</sup>)</b>     | 0.006;<br>0.891         | -0.138;<br><b>0.002</b>      | -0.208;<br><b>&lt;0.0001</b> | -0.250;<br><b>&lt;0.0001</b> | -0.179;<br><b>0.0001</b>     |
| <b>Fibro-fatty burden (mm<sup>2</sup>)</b> | -0.036;<br>0.411        | -0.195;<br><b>&lt;0.0001</b> | -0.302;<br><b>&lt;0.0001</b> | -0.342;<br><b>&lt;0.0001</b> | -0.271;<br><b>&lt;0.0001</b> |
| <b>Necrotic burden (mm<sup>2</sup>)</b>    | 0.034;<br>0.450         | -0.288;<br><b>&lt;0.0001</b> | -0.276;<br><b>&lt;0.0001</b> | -0.307;<br><b>&lt;0.0001</b> | -0.181;<br><b>0.0001</b>     |

Results from Spearman correlation were reported as *r* coefficient (P values). P<0.05 considered significant. TB, total burden; NCB, Non-calcified burden; CAC, Agatston score; FB, fibrous plaque burden; FFB, fibro-fatty burden; NB, necrotic burden

**Supplemental Table 6.** Multivariable adjusted linear regression analysis for oxLDL

(A)

| Model                                                                    | oxLDL         |             |             |
|--------------------------------------------------------------------------|---------------|-------------|-------------|
|                                                                          | LOW           | HIGH        | TOTAL       |
|                                                                          | <b>TB</b>     |             |             |
| Adjusted for age                                                         | -0.04; 0.44   | 0.12; 0.02  | 0.06; 0.10  |
| Adjusted for sex                                                         | 0.001; 0.99   | 0.07; 0.12  | 0.08; 0.01  |
| Adjusted for current smoking                                             | -0.04; 0.39   | 0.11; 0.02  | 0.06; 0.10  |
| Adjusted for BMI                                                         | -0.07; 0.13   | 0.03; 0.44  | -0.03; 0.39 |
| Adjusted for statin treatment                                            | -0.03; 0.50   | 0.11; 0.02  | 0.07; 0.05  |
| Adjusted for LDL-C                                                       | -0.02; 0.64   | 0.11; 0.02  | 0.07; 0.06  |
| Adjusted for TGs                                                         | -0.07; 0.16   | 0.11; 0.02  | 0.05; 0.18  |
| Adjusted for hsCRP                                                       | -0.04; 0.42   | 0.04; 0.35  | 0.01; 0.81  |
| Adjusted for age, sex, smoking, BMI, statin treatment, LDL-C, TGs, hsCRP | -0.07; 0.14   | -0.06; 0.19 | -0.02; 0.50 |
|                                                                          | <b>NCB</b>    |             |             |
| Adjusted for age                                                         | -0.03; 0.60   | 0.12; 0.01  | 0.06; 0.10  |
| Adjusted for sex                                                         | 0.02; 0.66    | 0.08; 0.08  | 0.09; 0.005 |
| Adjusted for current smoking                                             | -0.02; 0.67   | 0.12; 0.02  | 0.07; 0.05  |
| Adjusted for BMI                                                         | -0.05; 0.27   | 0.03; 0.42  | -0.02; 0.47 |
| Adjusted for statin treatment                                            | -0.01; 0.79   | 0.12; 0.01  | 0.07; 0.05  |
| Adjusted for LDL-C                                                       | -0.01; 0.79   | 0.11; 0.02  | 0.06; 0.09  |
| Adjusted for TGs                                                         | -0.04; 0.37   | 0.12; 0.02  | 0.05; 0.11  |
| Adjusted for hsCRP                                                       | -0.02; 0.67   | 0.05; 0.31  | 0.02; 0.66  |
| Adjusted for age, sex, smoking, BMI, statin treatment, LDL-C, TGs, hsCRP | -0.05; 0.24   | -0.05; 0.28 | -0.04; 0.25 |
|                                                                          | <b>CAC</b>    |             |             |
| Adjusted for age                                                         | 0.02; 0.83    | 0.10; 0.18  | 0.04; 0.38  |
| Adjusted for sex                                                         | -0.03; 0.70   | 0.10; 0.23  | -0.01; 0.90 |
| Adjusted for current smoking                                             | -0.04; 0.64   | 0.13; 0.13  | -0.02; 0.72 |
| Adjusted for BMI                                                         | -0.05; 0.59   | 0.11; 0.17  | -0.03; 0.61 |
| Adjusted for statin treatment                                            | -0.04; 0.56   | 0.13; 0.11  | 0.04; 0.45  |
| Adjusted for LDL-C                                                       | -0.0001; 0.99 | 0.13; 0.11  | 0.03; 0.64  |
| Adjusted for TGs                                                         | -0.06; 0.46   | 0.13; 0.12  | -0.03; 0.61 |
| Adjusted for hsCRP                                                       | -0.04; 0.62   | 0.13; 0.12  | -0.01; 0.90 |
| Adjusted for age, sex, smoking, BMI, statin treatment, LDL-C, TGs, hsCRP | 0.01; 0.94    | 0.05; 0.53  | 0.09; 0.11  |

Results from multivariable linear regression models were reported as standardized  $\beta$  coefficient (P values). The Bonferroni corrected P-value threshold was 0.002. TB, Total burden; NCB, Non-calcified burden; CAC, Agatston score. CAC and high-sensitivity C-reactive protein (hsCRP) were log-transformed.

**(B)**

| Model                                                                    | oxLDL       |               |               |
|--------------------------------------------------------------------------|-------------|---------------|---------------|
|                                                                          | LOW         | HIGH          | TOTAL         |
|                                                                          | <b>FB</b>   |               |               |
| Adjusted for age                                                         | -0.08; 0.10 | 0.09; 0.047   | 0.04; 0.25    |
| Adjusted for sex                                                         | -0.04; 0.37 | 0.06; 0.24    | 0.07; 0.03    |
| Adjusted for current smoking                                             | -0.07; 0.15 | 0.08; 0.09    | 0.05; 0.12    |
| Adjusted for BMI                                                         | -0.09; 0.05 | 0.03; 0.47    | 0.001; 0.98   |
| Adjusted for statin treatment                                            | -0.07; 0.15 | 0.08; 0.08    | 0.05; 0.18    |
| Adjusted for LDL-C                                                       | -0.08; 0.09 | 0.09; 0.05    | 0.06; 0.10    |
| Adjusted for TGs                                                         | -0.09; 0.07 | 0.08; 0.09    | 0.05; 0.12    |
| Adjusted for hsCRP                                                       | -0.06; 0.20 | 0.05; 0.30    | 0.04; 0.29    |
| Adjusted for age, sex, smoking, BMI, statin treatment, LDL-C, TGs, hsCRP | -0.09; 0.05 | 0.01; 0.83    | 0.01; 0.79    |
|                                                                          | <b>FFB</b>  |               |               |
| Adjusted for age                                                         | -0.05; 0.26 | 0.23; <0.0001 | 0.11; 0.001   |
| Adjusted for sex                                                         | -0.01; 0.85 | 0.21; <0.0001 | 0.14; <0.0001 |
| Adjusted for current smoking                                             | -0.04; 0.44 | 0.23; <0.0001 | 0.13; <0.0001 |
| Adjusted for BMI                                                         | -0.06; 0.22 | 0.18; <0.0001 | 0.07; 0.04    |
| Adjusted for statin treatment                                            | -0.03; 0.49 | 0.23; <0.0001 | 0.13; <0.0001 |
| Adjusted for LDL-C                                                       | -0.03; 0.52 | 0.24; <0.0001 | 0.14; <0.0001 |
| Adjusted for TGs                                                         | -0.06; 0.20 | 0.23; <0.0001 | 0.12; 0.001   |
| Adjusted for hsCRP                                                       | -0.04; 0.38 | 0.19; <0.0001 | 0.09; 0.01    |
| Adjusted for age, sex, smoking, BMI, statin treatment, LDL-C, TGs, hsCRP | -0.06; 0.17 | 0.15; 0.001   | 0.08; 0.03    |
|                                                                          | <b>NB</b>   |               |               |
| Adjusted for age                                                         | -0.09; 0.04 | 0.23; <0.0001 | 0.12; <0.0001 |
| Adjusted for sex                                                         | -0.06; 0.21 | 0.22; <0.0001 | 0.14; <0.0001 |
| Adjusted for current smoking                                             | -0.08; 0.09 | 0.23; <0.0001 | 0.13; <0.0001 |
| Adjusted for BMI                                                         | -0.10; 0.03 | 0.19; <0.0001 | 0.08; 0.01    |
| Adjusted for statin treatment                                            | -0.08; 0.08 | 0.23; <0.0001 | 0.14; <0.0001 |
| Adjusted for LDL-C                                                       | -0.08; 0.09 | 0.24; <0.0001 | 0.16; <0.0001 |
| Adjusted for TGs                                                         | -0.11; 0.02 | 0.23; <0.0001 | 0.13; <0.0001 |
| Adjusted for hsCRP                                                       | -0.09; 0.07 | 0.21; <0.0001 | 0.11; 0.001   |
| Adjusted for age, sex, smoking, BMI, statin treatment, LDL-C, TGs, hsCRP | -0.11; 0.03 | 0.20; <0.0001 | 0.12; 0.001   |

Results from multivariable linear regression models were reported as standardized  $\beta$  coefficient (P values). The Bonferroni corrected P-value threshold was 0.002. CAC, Agatston score. Necrotic burden, CAC and high-sensitivity C-reactive protein (hsCRP) were log-transformed.

**Supplemental Table 7.** Multivariable adjusted linear regression analysis for oxHDL  
(A)

| Model                                                                    | oxHDL        |             |                |
|--------------------------------------------------------------------------|--------------|-------------|----------------|
|                                                                          | LOW          | HIGH        | TOTAL          |
|                                                                          | <b>TB</b>    |             |                |
| Adjusted for age                                                         | -0.11; 0.08  | -0.05; 0.40 | -0.04; 0.36    |
| Adjusted for sex                                                         | -0.06; 0.29  | 0.04; 0.45  | 0.03; 0.51     |
| Adjusted for current smoking                                             | -0.10; 0.11  | -0.05; 0.39 | -0.04; 0.41    |
| Adjusted for BMI                                                         | -0.05; 0.33  | -0.12; 0.04 | -0.06; 0.12    |
| Adjusted for statin treatment                                            | -0.10; 0.11  | -0.05; 0.44 | -0.05; 0.28    |
| Adjusted for LDL-C                                                       | -0.10; 0.12  | -0.06; 0.35 | -0.05; 0.30    |
| Adjusted for TGs                                                         | -0.04; 0.49  | -0.05; 0.39 | -0.01; 0.89    |
| Adjusted for hsCRP                                                       | -0.01; 0.91  | -0.11; 0.09 | -0.06; 0.16    |
| Adjusted for age, sex, smoking, BMI, statin treatment, LDL-C, TGs, hsCRP | 0.08; 0.17   | -0.04; 0.47 | 0.01; 0.78     |
|                                                                          | <b>NCB</b>   |             |                |
| Adjusted for age                                                         | -0.09; 0.18  | -0.04; 0.53 | -0.01; 0.89    |
| Adjusted for sex                                                         | -0.06; 0.32  | 0.05; 0.40  | 0.04; 0.32     |
| Adjusted for current smoking                                             | -0.10; 0.12  | -0.05; 0.47 | -0.02;<br>0.64 |
| Adjusted for BMI                                                         | -0.05; 0.40  | -0.12; 0.05 | -0.05; 0.23    |
| Adjusted for statin treatment                                            | -0.10; 0.12  | -0.04; 0.58 | -0.03; 0.58    |
| Adjusted for LDL-C                                                       | -0.10; 0.13  | -0.05; 0.46 | -0.03; 0.52    |
| Adjusted for TGs                                                         | -0.04; 0.50  | -0.05; 0.48 | 0.01; 0.83     |
| Adjusted for hsCRP                                                       | -0.003; 0.96 | -0.11; 0.10 | -0.04; 0.33    |
| Adjusted for age, sex, smoking, BMI, statin treatment, LDL-C, TGs, hsCRP | 0.09; 0.10   | -0.04; 0.53 | 0.04; 0.28     |
|                                                                          | <b>CAC</b>   |             |                |
| Adjusted for age                                                         | -0.13; 0.16  | 0.02; 0.83  | 0.03; 0.71     |
| Adjusted for sex                                                         | 0.02; 0.83   | 0.08; 0.46  | 0.18; 0.02     |
| Adjusted for current smoking                                             | -0.01; 0.92  | 0.05; 0.66  | 0.14; 0.08     |
| Adjusted for BMI                                                         | -0.01; 0.93  | 0.05; 0.69  | 0.14; 0.07     |
| Adjusted for statin treatment                                            | -0.01; 0.90  | 0.02; 0.83  | 0.08; 0.25     |
| Adjusted for LDL-C                                                       | 0.003; 0.98  | 0.04; 0.70  | 0.14; 0.07     |
| Adjusted for TGs                                                         | 0.002; 0.99  | 0.06; 0.59  | 0.15; 0.05     |
| Adjusted for hsCRP                                                       | -0.02; 0.89  | 0.06; 0.64  | 0.12; 0.12     |
| Adjusted for age, sex, smoking, BMI, statin treatment, LDL-C, TGs, hsCRP | -0.06; 0.48  | 0.03; 0.80  | 0.02; 0.74     |

Results from multivariable linear regression models were reported as standardized  $\beta$  coefficient (P values). The Bonferroni corrected P-value threshold was 0.002. TB, Total burden; NCB, Non-calcified burden; CAC, Agatston score; high-sensitivity C-reactive protein (hsCRP); oxHDL, oxidized HDL. CAC, oxHDL and hsCRP were log-transformed.



**(B)**

| Model                                                                    | oxHDL               |             |                          |
|--------------------------------------------------------------------------|---------------------|-------------|--------------------------|
|                                                                          | LOW                 | HIGH        | TOTAL                    |
|                                                                          | <b>FB</b>           |             |                          |
| Adjusted for age                                                         | -.03; 0.68          | -0.12; 0.07 | -0.10; 0.02              |
| Adjusted for sex                                                         | -.02; 0.80          | -0.04; 0.50 | -0.07; 0.10              |
| Adjusted for current smoking                                             | -.05; 0.45          | -0.11; 0.07 | -0.12; 0.01              |
| Adjusted for BMI                                                         | -.02; 0.78          | -0.17; 0.01 | -0.14; <b>0.001</b>      |
| Adjusted for statin treatment                                            | -.05; 0.45          | -0.11; 0.08 | -0.12; 0.01              |
| Adjusted for LDL-C                                                       | -.05; 0.47          | -0.12; 0.06 | -0.13; 0.004             |
| Adjusted for TGs                                                         | -.02; 0.80          | -0.12; 0.07 | -0.10; 0.02              |
| Adjusted for hsCRP                                                       | .01; 0.93           | -0.16; 0.01 | -0.13; 0.003             |
| Adjusted for age, sex, smoking, BMI, statin treatment, LDL-C, TGs, hsCRP | .09; 0.17           | -0.12; 0.06 | -0.06; 0.16              |
|                                                                          | <b>FFB</b>          |             |                          |
| Adjusted for age                                                         | -0.18; 0.01         | -0.10; 0.10 | -0.18; <b>&lt;0.0001</b> |
| Adjusted for sex                                                         | -0.18; 0.01         | -0.04; 0.55 | -0.16; <b>&lt;0.0001</b> |
| Adjusted for current smoking                                             | -0.20; <b>0.002</b> | -0.10; 0.11 | -0.19; <b>&lt;0.0001</b> |
| Adjusted for BMI                                                         | -0.16; 0.01         | -0.13; 0.04 | -0.21; <b>&lt;0.0001</b> |
| Adjusted for statin treatment                                            | -0.20; <b>0.002</b> | -0.10; 0.10 | -0.20; <b>&lt;0.0001</b> |
| Adjusted for LDL-C                                                       | -0.19; <b>0.002</b> | -0.11; 0.07 | -0.20; <b>&lt;0.0001</b> |
| Adjusted for TGs                                                         | -0.17; 0.01         | -0.10; 0.10 | -0.18; <b>&lt;0.0001</b> |
| Adjusted for hsCRP                                                       | -0.13; 0.03         | -0.12; 0.09 | -0.21; <b>&lt;0.0001</b> |
| Adjusted for age, sex, smoking, BMI, statin treatment, LDL-C, TGs, hsCRP | -0.06; 0.34         | -0.04; 0.51 | -0.14; 0.003             |
|                                                                          | <b>NB</b>           |             |                          |
| Adjusted for age                                                         | -0.17; 0.01         | -0.12; 0.06 | -0.27; <b>&lt;0.0001</b> |
| Adjusted for sex                                                         | -0.16; 0.01         | -0.05; 0.43 | -0.23; <b>&lt;0.0001</b> |
| Adjusted for current smoking                                             | -0.18; 0.004        | -0.12; 0.06 | -0.27; <b>&lt;0.0001</b> |
| Adjusted for BMI                                                         | -0.16; 0.01         | -0.15; 0.02 | -0.29; <b>&lt;0.0001</b> |
| Adjusted for statin treatment                                            | -0.18; 0.01         | -0.13; 0.05 | -0.29; <b>&lt;0.0001</b> |
| Adjusted for LDL-C                                                       | -0.17; 0.01         | -0.13; 0.05 | -0.28; <b>&lt;0.0001</b> |
| Adjusted for TGs                                                         | -0.17; 0.01         | -0.12; 0.06 | -0.27; <b>&lt;0.0001</b> |
| Adjusted for hsCRP                                                       | -0.12; 0.06         | -0.14; 0.04 | -0.28; <b>&lt;0.0001</b> |
| Adjusted for age, sex, smoking, BMI, statin treatment, LDL-C, TGs, hsCRP | -0.07; 0.28         | -0.08; 0.21 | -0.25; <b>&lt;0.0001</b> |

Results from multivariable linear regression models were reported as standardized  $\beta$  coefficient (P values). The Bonferroni corrected P-value threshold was 0.002. CAC; Agatston score; oxHDL, oxidized HDL. Necrotic burden, CAC, oxHDL and high-sensitivity C-reactive protein (hsCRP) were log-transformed.

**Supplemental Table 8.** Comparison between oxLDL and oxHDL association with CCTA plaque characteristics

| Variable                                   | oxLDL       |                         | oxHDL               |             |
|--------------------------------------------|-------------|-------------------------|---------------------|-------------|
|                                            | LOW         | HIGH                    | LOW                 | HIGH        |
| <b>CCTA</b>                                |             |                         |                     |             |
| <b>TB</b>                                  | -0.03; 0.50 | 0.11; <b>0.02</b>       | -0.10; 0.11         | -0.06; 0.34 |
| <b>NCB</b>                                 | -0.01; 0.79 | 0.12; <b>0.01</b>       | -0.10; 0.12         | -0.05; 0.43 |
| <b>CAC</b>                                 | -0.04; 0.60 | 0.13; 0.12              | -0.07; 0.53         | 0.015; 0.89 |
| <b>Plaque morphology index</b>             |             |                         |                     |             |
| <b>Fibrous burden (mm<sup>2</sup>)</b>     | -0.07; 0.15 | 0.08; 0.08              | -0.05; 0.45         | -0.12; 0.06 |
| <b>Fibro-fatty burden (mm<sup>2</sup>)</b> | -0.03; 0.49 | 0.23; <b>&lt;0.0001</b> | -0.20; <b>0.002</b> | -0.11; 0.08 |
| <b>Necrotic burden (mm<sup>2</sup>)</b>    | -0.08; 0.08 | 0.23; <b>&lt;0.0001</b> | -0.18; <b>0.004</b> | -0.12; 0.05 |

Results from univariable linear regression were reported as standardized  $\beta$  coefficient (P values). P<0.05 considered significant. TB, total burden; NCB, Non-calcified burden; CAC, Agatston score. oxHDL, necrotic burden and CAC were log-transformed.

**Supplemental Table 9.** Association between CEC levels and lipoproteins

| Variable      | CEC                 |               |                      |
|---------------|---------------------|---------------|----------------------|
|               | LOW                 | HIGH          | TOTAL                |
| <b>HDL-C</b>  | 0.163; <b>0.045</b> | -0.048; 0.556 | 0.229; <b>0.0001</b> |
| <b>oxHDL</b>  | 0.168; 0.151        | -0.114; 0.263 | 0.007; 0.930         |
| <b>ApoA-I</b> | 0.179; <b>0.028</b> | -0.034; 0.681 | 0.221; <b>0.0001</b> |

Results from Spearman correlation were reported as  $r$  coefficient (P values). P<0.05 considered significant.

**Supplemental Table 10.** Association between CETP activity and lipoproteins

| Variable | CETP                 |                    |                      |
|----------|----------------------|--------------------|----------------------|
|          | LOW                  | HIGH               | TOTAL                |
| oxLDL    | 0.083; 0.317         | -0.062; 0.454      | 0.132; <b>0.023</b>  |
| oxHDL    | -0.217; <b>0.036</b> | -0.187; 0.102      | -0.249; <b>0.001</b> |
| TGs      | -0.129; 0.119        | -0.072; 0.384      | -0.095; 0.101        |
| LDL-TG   | 0.036; 0.660         | 0.517; <b>0.05</b> | 0.011; 0.847         |
| sdLDL-C  | -0.040; 0.627        | -0.022; 0.786      | 0.034; 0.565         |
| LDLP     | 0.046; 0.588         | 0.011; 0.900       | 0.068; 0.245         |
| TRLPs    | -0.040; 0.635        | -0.046; 0.577      | -0.018; 0.761        |

Results from Spearman correlation were reported as *r* coefficient (P values). P<0.05 considered significant. CETP, cholesteryl ester transfer protein; oxHDL, oxidized HDL; oxLDL, oxidized LDL.

**Supplemental Table 11.** Difference in triglycerides-rich lipids among low and high oxHDL groups

| Parameters            | LOW_oxHDL (N=86)      | HIGH_oxHDL (N=87)     | P           |
|-----------------------|-----------------------|-----------------------|-------------|
| LDL-TG (mg/dL)        | 15.91 ± 5.34          | 15.11 ± 4.05          | 0.26        |
| Triglycerides (mg/dL) | 121 (85-169)          | 98 (66-156)           | <b>0.02</b> |
| TG-Rich Particle      | 128.60 (90.10-175.65) | 102.97 (41.19-163.89) | <b>0.01</b> |
| Very LargeTRLP        | 0.18 (0.07-0.40)      | 0.14 (0.05-0.24)      | 0.13        |
| Large TRLP            | 1.97 (0.53-4.97)      | 1.37 (0.39-3.45)      | 0.19        |
| Medium TRLP           | 25.95 (11.38-50.72)   | 16.75 (11.27-37.50)   | 0.27        |
| Small TRLP            | 37.87 (16.72-60.15)   | 32.35 (13.42-53.31)   | 0.35        |
| Very Small TRLP       | 55.71 (24.35-99.98)   | 47.92 (15.10-95.99)   | 0.23        |

Data represented as mean ± SD or median (IQR). P values were derived from 2-tailed Student t-test for parametric variables and Wilcoxon rank-sum test for non-parametric variables. P<0.05 considered significant.

**Supplemental Table 12.** Demographic and clinical characteristics of the study cohort stratified by oxHDL levels for the proteomics analysis

| Parameter                               | LOW, n=10        | HIGH, n=10       | P            |
|-----------------------------------------|------------------|------------------|--------------|
| <b>Demographics and medical history</b> |                  |                  |              |
| Age (years)                             | 53.92 ± 13.91    | 60.47 ± 8.19     | 0.22         |
| Male sex, n (%)                         | 7 (70)           | 4 (40)           | 0.37         |
| Body mass index (kg/m <sup>2</sup> )    | 29.19 ± 5.28     | 25.77 ± 3.49     | 0.10         |
| Hypertension, n (%)                     | 5 (50)           | 1 (10)           | 0.14         |
| Type 2-diabetes, n (%)                  | 0 (0)            | 3 (30)           | 0.21         |
| Current smoker, n (%)                   | 0 (0)            | 1 (10)           | 1.00         |
| Statin treatment, n (%)                 | 4 (40)           | 7 (70)           | 0.37         |
| Post-PCI, n (%)                         | 0 (0)            | 2 (20)           | 0.47         |
| Post-CABG, n (%)                        | 1 (10)           | 1 (10)           | 1.00         |
| Race                                    |                  |                  | 0.26         |
| White, n (%)                            | 8 (80)           | 5 (50)           |              |
| Black or African American, n (%)        | 0 (0)            | 3 (30)           |              |
| Asian, n (%)                            | 2 (20)           | 1 (10)           |              |
| More than one race, n (%)               | 0 (0)            | 0 (0)            |              |
| Unknown, n (%)                          | 0 (0)            | 1 (10)           |              |
| <b>Clinical and laboratory values</b>   |                  |                  |              |
| Total cholesterol (mg/dL)               | 169.10 ± 67.31   | 176.10 ± 49.82   | 0.79         |
| HDL cholesterol (mg/dL)                 | 41.0 ± 20.95     | 64.40 ± 23.82    | <b>0.02</b>  |
| LDL cholesterol (mg/dL)                 | 107.8 ± 57.93    | 99.40 ± 38.22    | 0.71         |
| Triglycerides (mg/dL)                   | 138 (111-346)    | 68.5 (61-91)     | <b>0.01</b>  |
| LDL-TG (mg/dL)                          | 16.05 ± 3.63     | 15.98 ± 5.23     | 0.97         |
| sdLDL-C (mg/dL)                         | 36 (21.5-42.4)   | 29.3 (18.2-41.4) | 0.50         |
| ApoA-I (mg/dL)                          | 112 (108-172)    | 176 (128-190)    | <b>0.049</b> |
| ApoB (mg/dL)                            | 87.30 ± 32.21    | 84.90 ± 23.47    | 0.85         |
| ApoE-HDL-C (mg/dL)                      | 2.75 (2.4-6.80)  | 5.95 (3.0-7.8)   | 0.09         |
| ApoC-III in HDL (mg/dL)                 | 4.73 (2.51-6.78) | 3.69 (2.69-6.18) | 0.94         |
| Cholesterol efflux capacity             | 1.09 ± 0.14      | 1.20 ± 0.24      | 0.26         |
| CETP activity (pmol/μL/hr)              | 4.98 (4.00-7.99) | 4.47 (2.51-6.13) | 0.36         |
| hsCRP (mg/L)                            | 4.75 (1.8-6.8)   | 1.05 (0.6-1.9)   | <b>0.004</b> |
| GlycA (μmol/L)                          | 438.97 ± 72.71   | 365.24 ± 64.64   | <b>0.03</b>  |
| <b>NMR profile</b>                      |                  |                  |              |
| LDL Particle                            | 1686 (999-1828)  | 1345 (1069-1716) | 0.71         |
| L-LDLP                                  | 184 (46-225)     | 90 (7-206)       | 0.53         |
| M-LDLP                                  | 143 (64-1017)    | 841 (465-1094)   | 0.07         |
| S-LDLP                                  | 55 (629-1490)    | 445 (397-857)    | 0.09         |
| HDL Particle                            | 18.88 ± 6.02     | 19.88 ± 3.07     | 0.64         |
| L-HDLP                                  | 1.06 (0.45-1.52) | 2.76 (2.09-3.50) | <b>0.03</b>  |

|                                                     |                        |                           |                  |
|-----------------------------------------------------|------------------------|---------------------------|------------------|
| M-HDLP                                              | 3.90 (2.66- 4.86)      | 4.11 (2.38-5.03)          | 0.55             |
| S-HDLP                                              | 13 (10-18)             | 13 (10-15)                | 0.60             |
| TG-Rich Particle                                    | 232 (124-253)          | 54.32 (20.99-101.56)      | <b>0.01</b>      |
| Very Large TRLP                                     | 0.13 (0.08-0.23)       | 0.11 (0.05-0.19)          | 0.56             |
| Large TRLP                                          | 2.51 (1.16-4.01)       | 1.15 (0.30-1.97)          | 0.15             |
| Medium TRLP                                         | 32 (12-61)             | 15 (11-17)                | 0.14             |
| Small TRLP                                          | 40 (28-68)             | 8 (4-24)                  | <b>0.04</b>      |
| Very Small TRLP                                     | 125 (32-200)           | 24 (10-58)                | <b>0.04</b>      |
| <b>OMLs and pathway markers</b>                     |                        |                           |                  |
| oxLDL (U/L)                                         | 71.92 ± 18.35          | 71.44 ± 19.04             | 0.95             |
| sLOX-1 (pg/mL)                                      | 249.2 ± 66.72          | 203.88 ± 98.17            | 0.26             |
| sCD36 (ng/mL)                                       | 0.00 (0.00-0.00)       | 0.00 (0.00-0.00)          | 0.63             |
| oxHDL (U/mL)                                        | 302.80 (281.96-330.03) | 1258.38 (1031.27-1581.25) | <b>&lt;0.001</b> |
| <b>CCTA parameters and CAC score</b>                |                        |                           |                  |
| Total plaque burden (x100), mm <sup>2</sup>         | 1.12 (1.02-1.39)       | 0.85 (0.70-1.13)          | <b>0.004</b>     |
| Non-calcified plaque burden (x100), mm <sup>2</sup> | 1.06 (0.87-1.39)       | 0.82 (0.68-1.13)          | <b>0.01</b>      |
| CAC score                                           | 0 (0-3.09)             | 5.01 (2.57-5.59)          | <b>0.01</b>      |
| Fibrous plaque burden (x100), mm <sup>2</sup>       | 0.640 (0.445-0.746)    | 0.425 (0.326-0.552)       | <b>0.01</b>      |
| Fibro-fatty burden (x100), mm <sup>2</sup>          | 0.132 (0.073-0.309)    | 0.044 (0.026-0.100)       | <b>0.001</b>     |
| Necrotic burden (x100), mm <sup>2</sup>             | 0.030 (0.007-0.167)    | 0.005 (0.002-0.016)       | <b>0.002</b>     |

Data represented as mean ± SD or median (IQR) for parametric and non-parametric variables respectively and as n (%) for categorical variables. P values were derived from 2-tailed Student t-test for parametric variables, Wilcoxon rank-sum test for non-parametric variables, and Pearson's chi-square test for categorical variables. P<0.05 considered significant. CAC, Agatston score; CETP, cholesteryl ester transfer protein; hs(CRP), high-sensitivity C-reactive protein; OMLs, oxidation-modified lipoproteins; oxHDL, oxidized HDL; oxLDL, oxidized LDL; sCD36, soluble CD36; sLOX-1, soluble LOX-1.

**Supplemental Table 13.** Differences in the identified isoforms between high and low oxHDL groups

| Sequence                    | Modification                                       | P value | T Statistic |
|-----------------------------|----------------------------------------------------|---------|-------------|
| VQPYLDDFQKKWQEEMELYR        | P02647 1xDioxidation [W132]                        | 0.549   | 0.619       |
| <b>VQPYLDDFQKKWQEEMELYR</b> | P02647 1xOxidation [M136]                          | 0.061   | 2.288       |
| <b>VQPYLDDFQKKWQEEMELYR</b> | P02647 1xOxidation [M136];<br>1xDioxidation [W132] | 0.061   | 2.302       |
| VQPYLDDFQKKWQEEMELYR        | P02647 1xOxidation [W132]                          | 0.310   | 1.115       |
| VQPYLDDFQKK                 | P02647 2xOxidation<br>[P123(100); Y124(100)]       | 0.430   | -0.816      |
| WQEEMELYR                   | P02647 1xDioxidation [W132]                        | 0.835   | 0.212       |
| WQEEMELYR                   | P02647 1xOxidation [M136]                          | 0.509   | -0.675      |
| WQEEMELYR                   | P02647 1xOxidation [M136];<br>1xDioxidation [W132] | 0.766   | -0.305      |
| WQEEMELYR                   | P02647 1xOxidation [W132]                          | 0.311   | -1.054      |
| WQEEMELYR                   | P02647 2xOxidation [W132;<br>M136]                 | 0.804   | 0.252       |
| THLAPYSDEL R                | P02647 2xOxidation<br>[P189(100); Y190(100)]       | 0.713   | -0.374      |
| QGLLPVLESFK                 | P02647 1xOxidation<br>[P244(100)]                  | 0.273   | -1.156      |
| VSFLSALEEYTK                | P02647 1xOxidation<br>[Y260(100)]                  | 0.584   | -0.578      |
| <b>EQLGPVTQEFWDNLEK</b>     | P02647 1xDioxidation [W96]                         | 0.057   | -2.145      |
| EQLGPVTQEFWDNLEK            | P02647 1xOxidation [W96]                           | 0.785   | -0.278      |
| EQLGPVTQEFWDNLEK            | P02647 1xOxidation [M110];<br>1xDioxidation [W96]  | 0.800   | -0.274      |
| EQLGPVTQEFWDNLEK            | P02647 1xOxidation [M110]                          | 0.469   | 0.755       |
| LLDNWDSVTSTFSK              | P02647 1xDioxidation [W74]                         | 0.452   | -0.771      |
| LLDNWDSVTSTFSK              | P02647 1xOxidation [W74]                           | 0.759   | -0.313      |

P values were derived from the two-tailed T-Test with a P<0.1 considered significant.

**Supplemental Figure 1.** Characterization of human plasma fractions isolated with Protein G

**A**

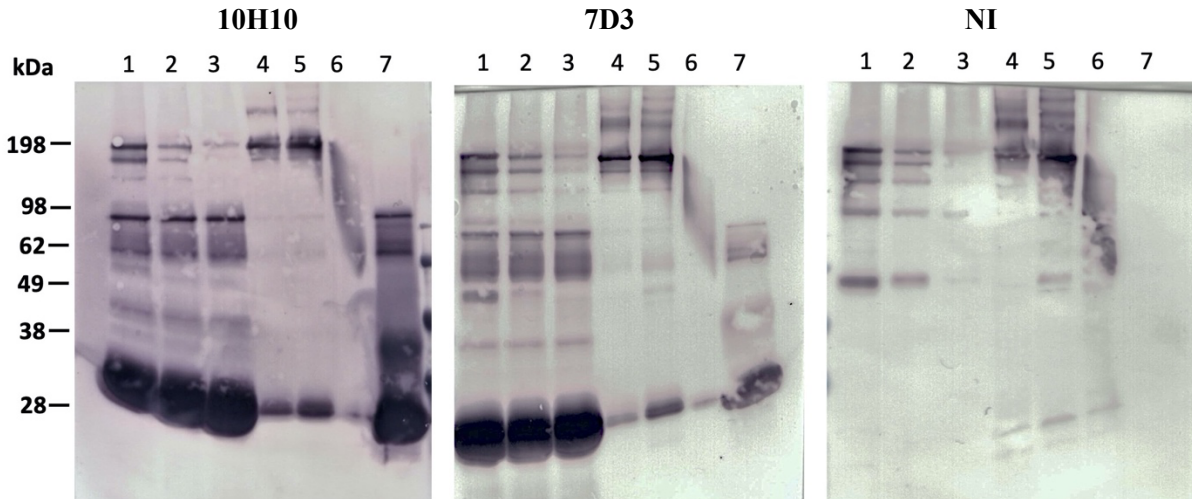

Lane 1: flow through after incubation with 10H10  
 Lane 2: flow through after incubation with 7D3  
 Lane 3: flow through after incubation with NI  
 Lane 4: magnetic beads after incubation with 10H10  
 Lane 5: magnetic beads after incubation with 7D3  
 Lane 6: magnetic beads after incubation with NI  
 Lane 7: HDL (from ultracentrifugation)

**B**

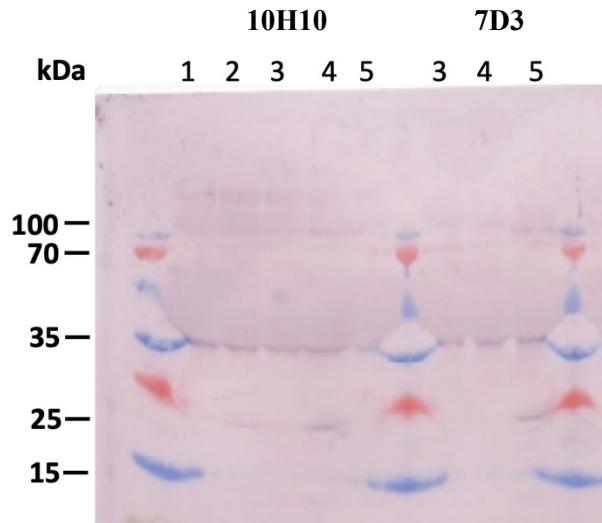

Lane 1: plasma 0 ul  
 Lane 2: plasma 50 ul  
 Lane 3: plasma 100 ul  
 Lane 4: plasma 200 ul  
 Lane 5: plasma 500 ul

C

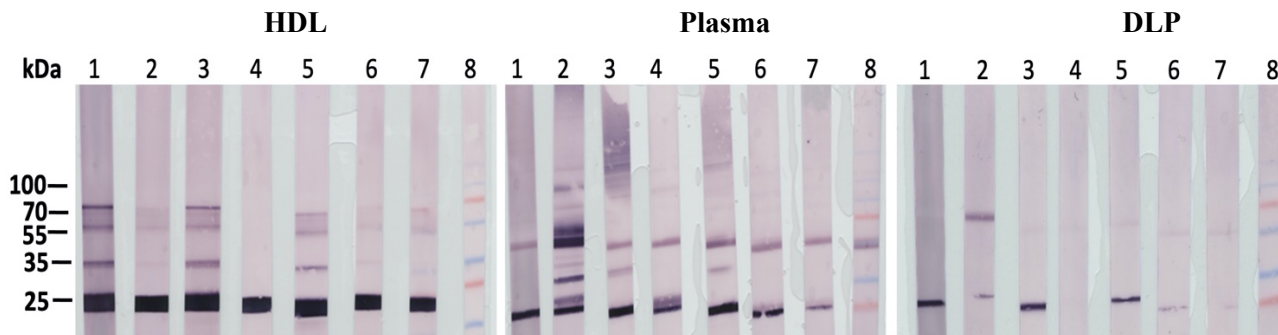

Lane 1: 10H10  
Lane 2: 10A12  
Lane 3: IC5  
Lane 4: 10D5  
Lane 5: 10E6  
Lane 6: 9C11  
Lane 7: 7D3  
Lane 8: NI (mouse)

D

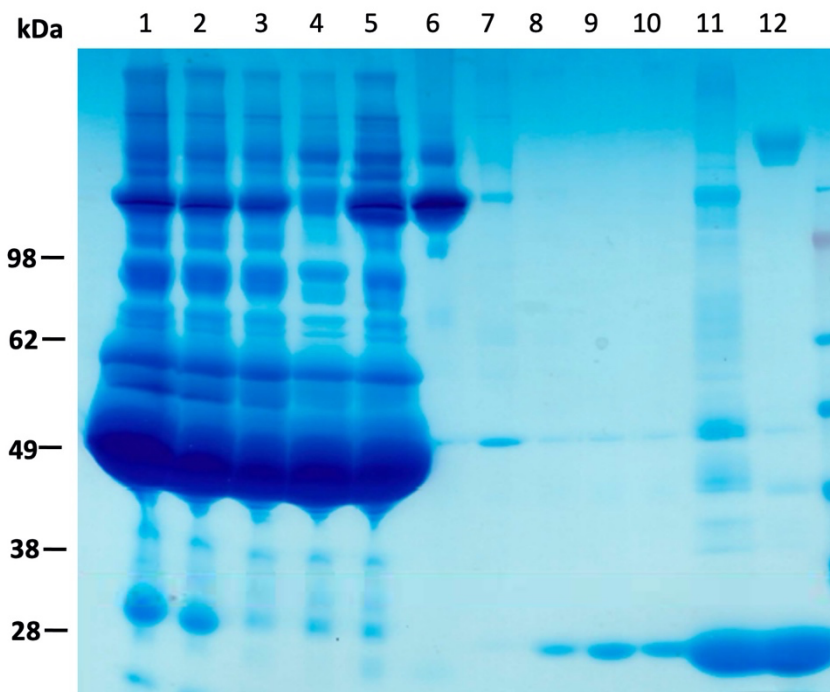

Lane 1: IgG flow through  
Lane 2: ApoB flow through  
Lane 3: HDL flow through column 1  
Lane 4: HDL flow through column 2  
Lane 5: HDL flow through column 3



Lane 6: IgG eluted  
Lane 7: ApoB eluted  
Lane 8: HDL column 1 eluted  
Lane 9: HDL column 2 eluted  
Lane 10: HDL column 3 eluted  
Lane 11: HDL/oxHDL column 3 concentrated  
Lane 12: ultracentrifuged HDL

**(A-B)** SDS-PAGE of human plasma stained with anti-ApoA-I (10H10), anti-oxApoA-I (7D3) and non-immune (NI) antibodies; **(C)** SDS-PAGE, detection of oxApoA-I in lipid fractions compared to different anti-ApoA-I mAbs clones; **(D)** Western blot, isolation of oxidized HDL by Protein G with anti-oxApoA-I mAb 7D3.

**Supplemental Figure 2.** MFA and tandem mass spectrometric analysis (LC-MS/MS) of the plasma isolated oxHDL

**A**

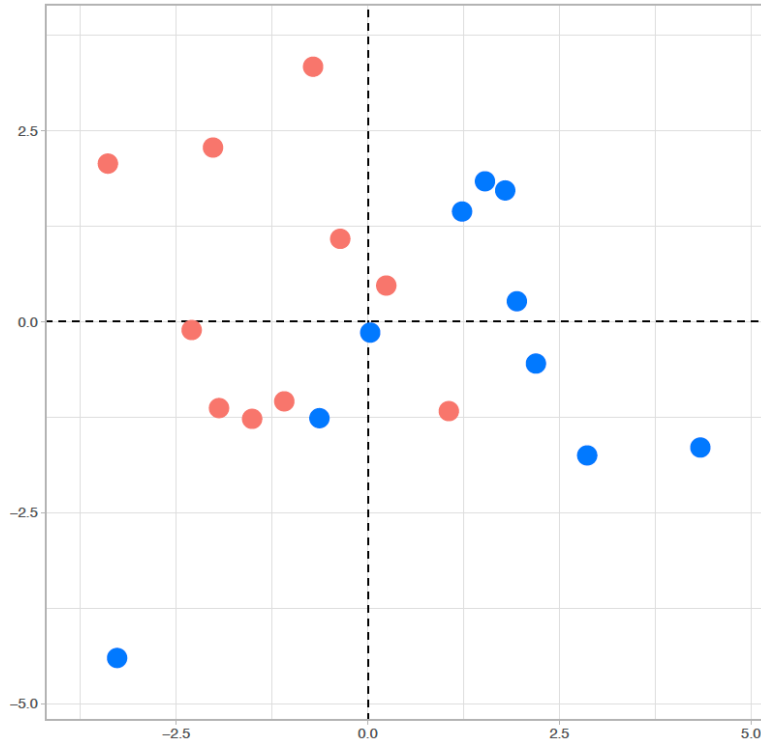

**B**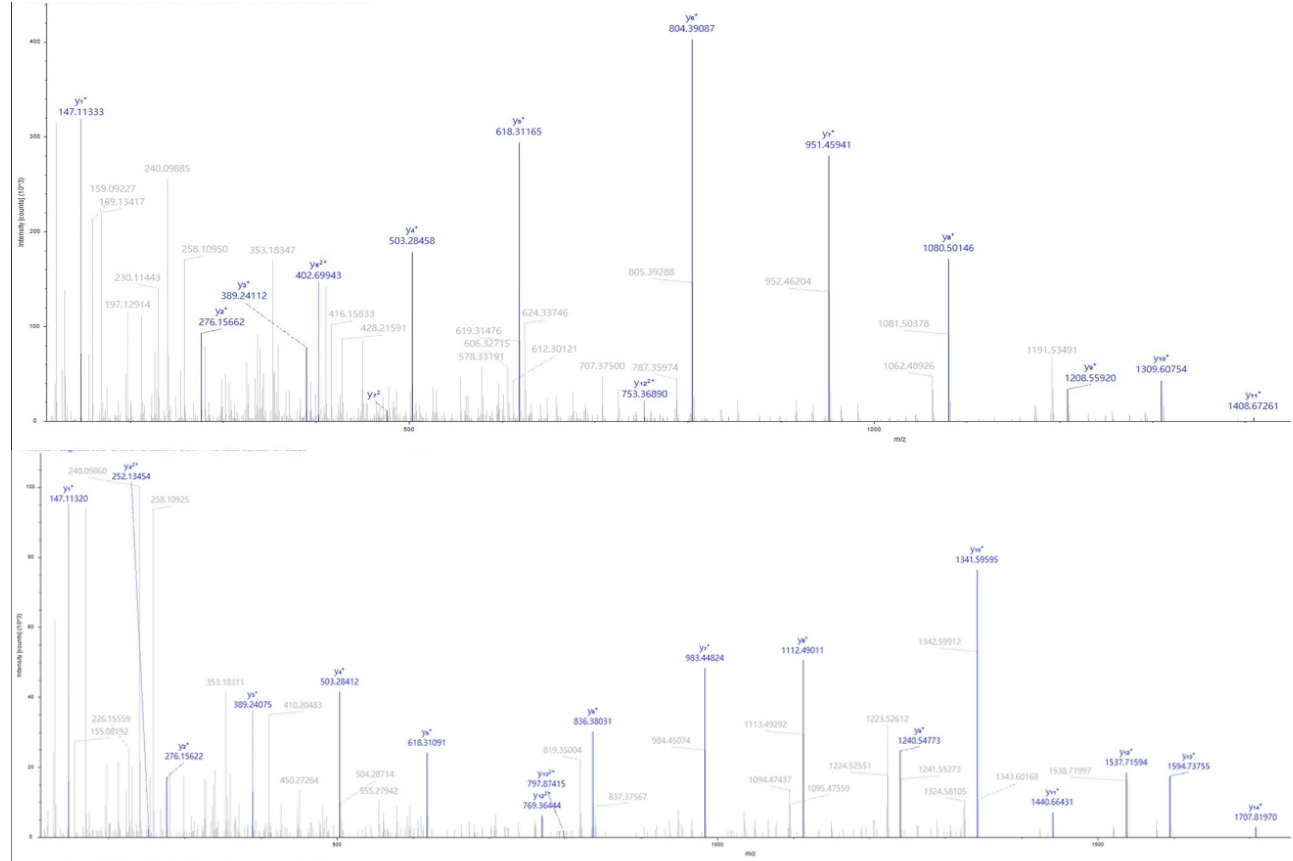**C**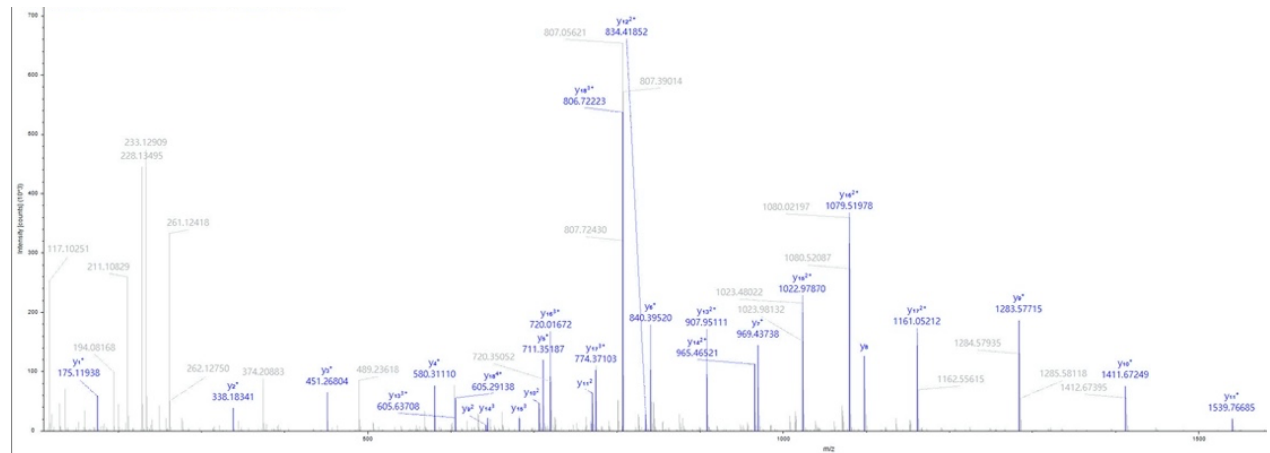

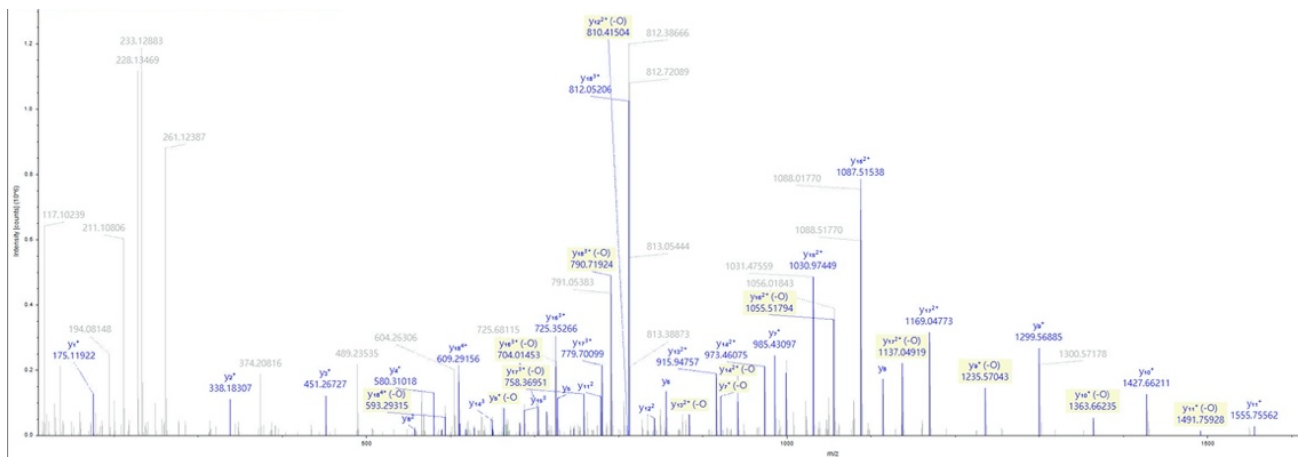

**D**

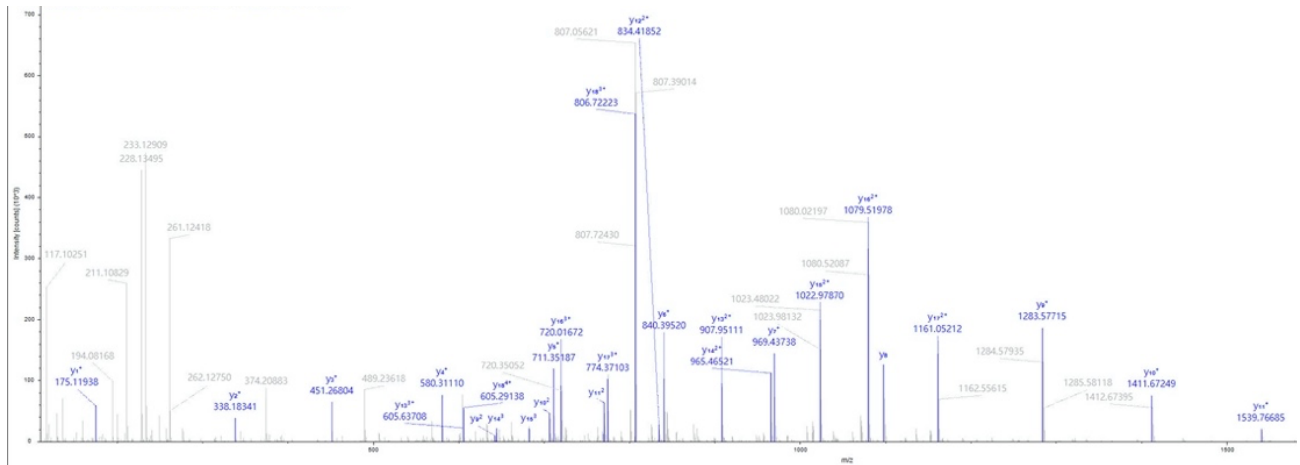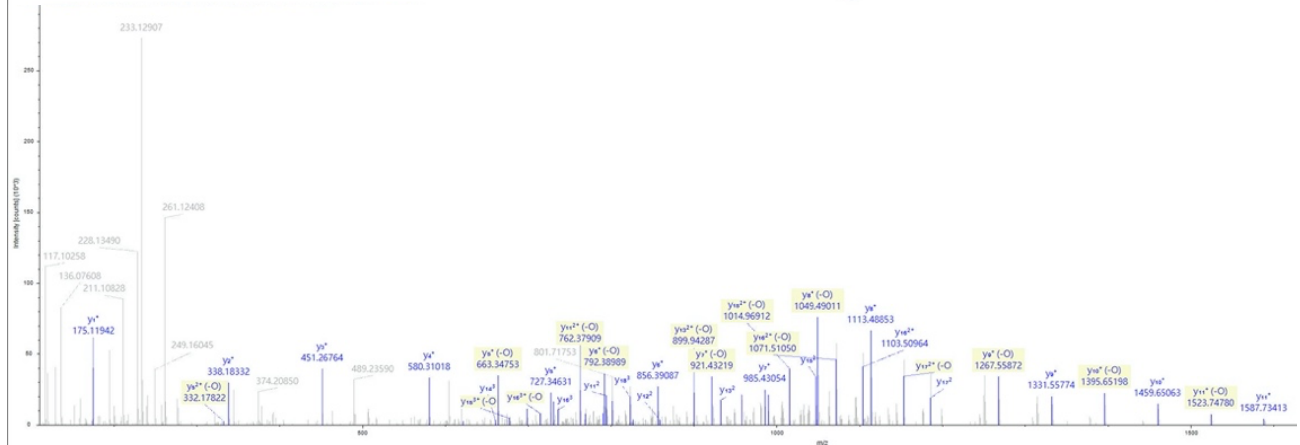

(A) 2-dimensional loading plot of the analyzed oxHDL plasma samples, red circles represent high oxHDL and blue circles are low oxHDL; MS/MS analysis identifying ions of (B) m/z 1932 and m/z 1964 as apoA-I peptide EQLGPVTQEFWDNLEK and the dioxidation EQLGPVTQEFW<sub>2ox</sub>DNLEK, respectively; (C) m/z 2645 and m/z 2661 as apoA-I peptide VQPYLDDFQKKWQEEMELYR and the oxidized VQPYLDDFQKKWQEEM<sub>ox</sub>ELYR, respectively; (D) m/z 2645 and m/z 2693 as apoA-I peptide VQPYLDDFQKKWQEEMELYR and the multiple oxidized VQPYLDDFQKKW<sub>2ox</sub>QEEM<sub>ox</sub>ELYR, respectively.
